# Supplementary material for: Improved Chironomid Barcode Database Enhances Identification of Water Mite Dietary Content
Source: MDPI journal article supplement (doi:10.3390/d14020065), 2022-01-19
Supplement: s1 [file s1]

Archive with 2 entries (2 files):
- Figure S1.pdf
- Table S1.pdf
