# Supplementary material for: Improved Chironomid Barcode Database Enhances Identification of Water Mite Dietary Content
Source: MDPI journal article supplement (doi:10.3390/d14020065), 2022-01-19
Supplement: s1 [file s1 › Figure S1.pdf]

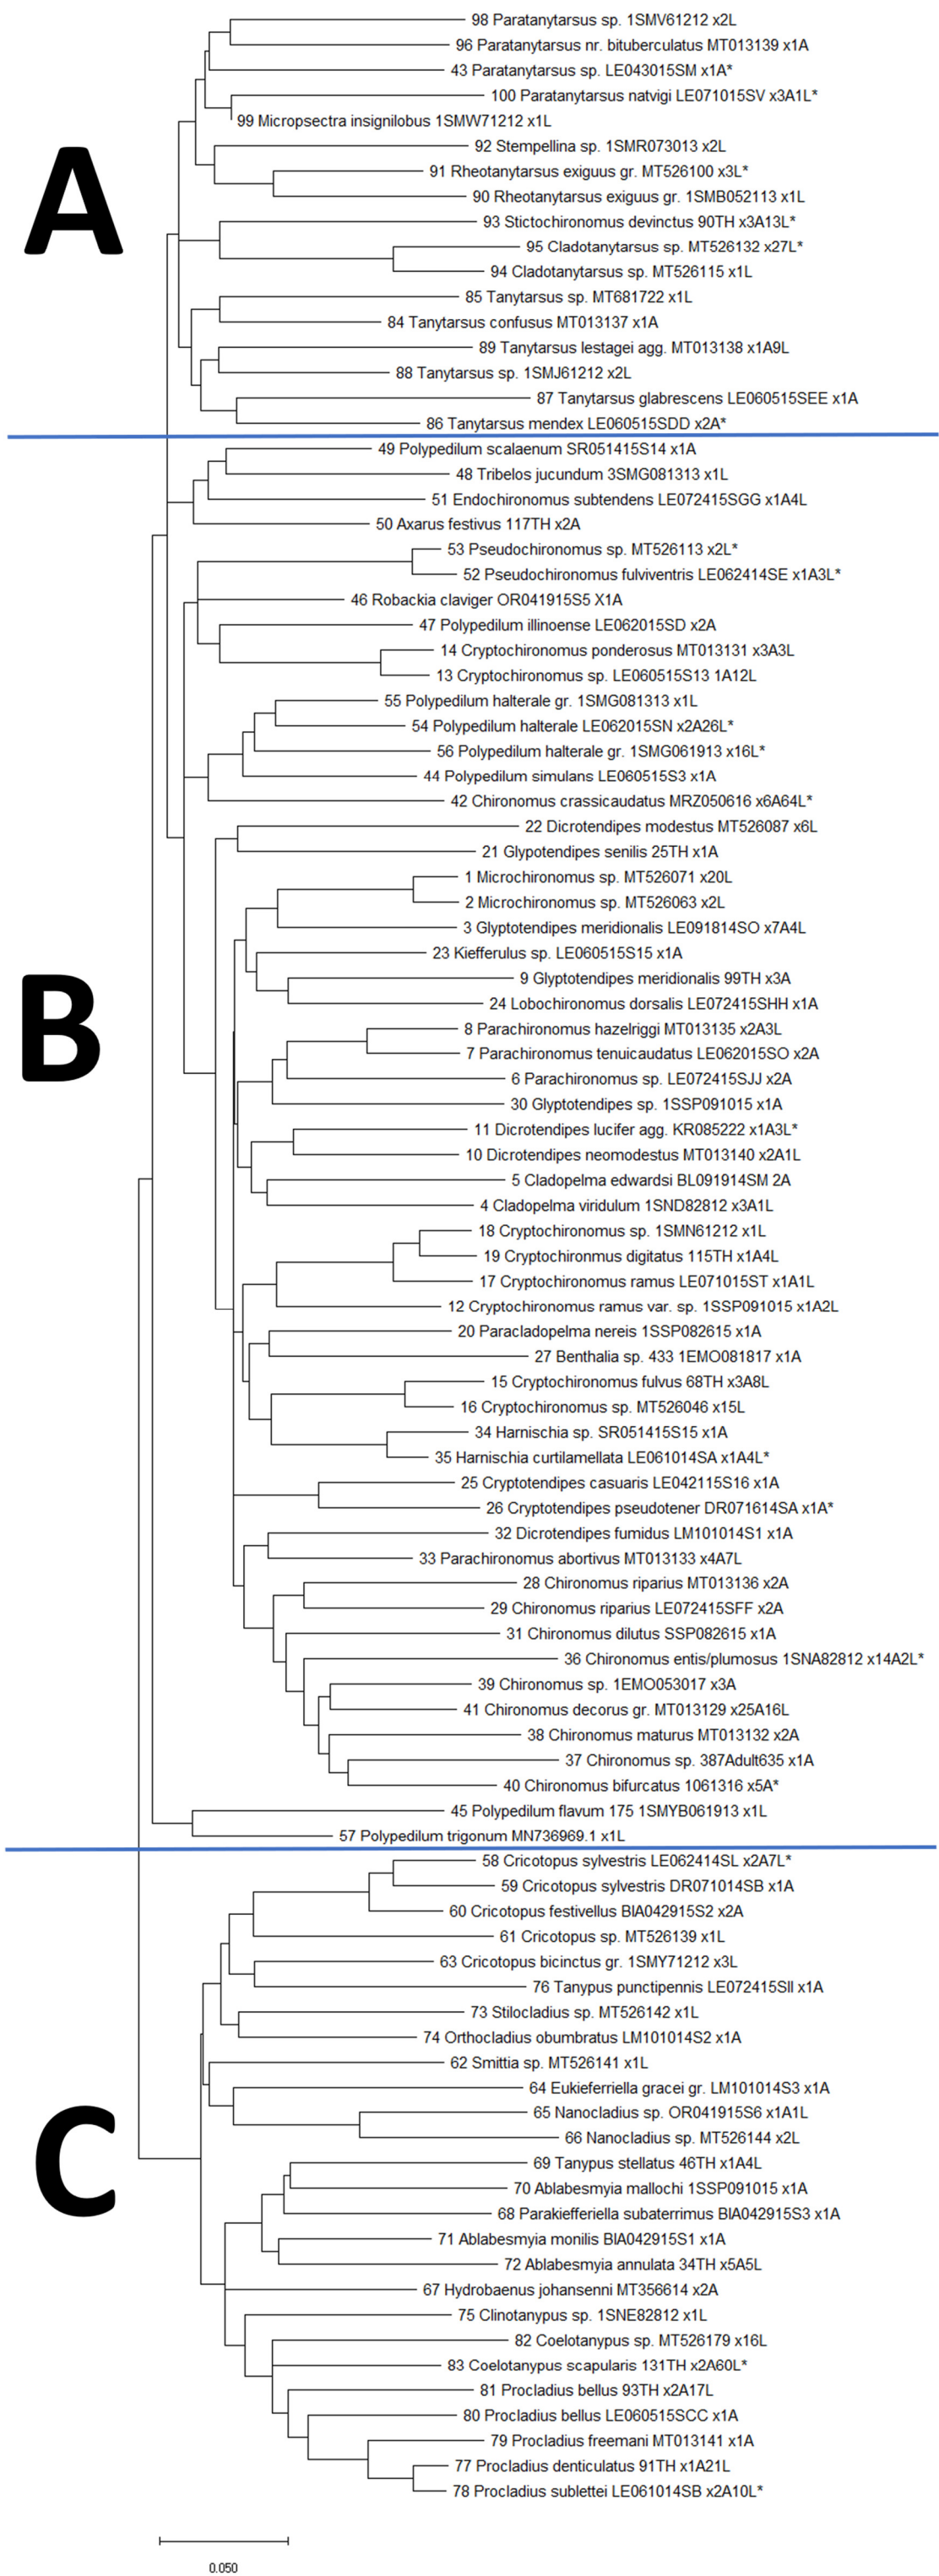

**Figure S1.** 99 sequences in the Chironomid curated database, shown in a neighbor-joining tree (same data as Figure 2 in the main text). Parts A, B, and C above show the relationships of Figures 2A, 2B, and 2C in the main text.
