# Supplementary material for: Improved Chironomid Barcode Database Enhances Identification of Water Mite Dietary Content
Source: MDPI journal article supplement (doi:10.3390/d14020065), 2022-01-19
Supplement: s1 [file s1 › Table S1.pdf]

**Table S1.** Curation notes regarding the chironomid database: comments, corrections, additional literature and omitted sequences.

| Branch Number | Consensus Identification          | # of sequences removed | Name and/or sequence removed from database as a likely error | Curated Branch Annotation (A= adult; L=larva)                                                                                                                                                                                                                                                                                                                                                       |
|---------------|-----------------------------------|------------------------|--------------------------------------------------------------|-----------------------------------------------------------------------------------------------------------------------------------------------------------------------------------------------------------------------------------------------------------------------------------------------------------------------------------------------------------------------------------------------------|
| 11            | <i>Dicrotendipes lucifer</i> agg. | -                      | <i>Dicrotendipes lucifer</i>                                 | Specimens were identified as <i>D. lucifer</i> (1 A) and <i>D. simpsoni</i> (3L). Both species are part of a complex known as <i>D. lucifer</i> agg. (Epler, 1987) and therefore combined under this single name.                                                                                                                                                                                   |
| 26            | <i>Cryptotendipes pseudotener</i> | 1                      | <i>Cladopelma</i> sp.                                        | Specimens were identified as <i>C. pseudotener</i> (1A) and <i>Cladopelma</i> sp. (1A). Closest genus level sequences in GenBank include <i>Cryptotendipes</i> , (10.5% distance), not <i>Cladopelma</i> . <i>Cladopelma</i> genera barcodes, including those in GenBank and this database, are >13% different from the removed sequence                                                            |
| 35            | <i>Harnischia curtilamellata</i>  | 1                      | <i>Cryptochironomus</i> sp.                                  | Specimens were identified as <i>Harnischia</i> sp. (3L), <i>Harnischia curtilamellata</i> (1A), and <i>Cryptochironomus</i> sp. (1L). <i>Cryptochironomus</i> sp. did not agree with the consensus genus and was removed.                                                                                                                                                                           |
| 36            | <i>Chironomus entis/plumosus</i>  | 2                      | <i>Chironomus crassicaudatus</i><br><i>Chironomus magnus</i> | Specimens were identified as <i>Chironomus</i> sp. (3L6A), <i>Chironomus plumosus</i> gr. (2A), <i>Chironomus plumosus</i> (5A), <i>Chironomus entis/plumosus</i> (1A) <i>Chironomus crassicaudatus</i> (1A), and <i>Chironomus magnus</i> (1A). The last two did not agree with the consensus species and were removed.[1,2].                                                                      |
| 40            | <i>Chironomus bifurcatus</i>      | 1                      | <i>Chironomus decorus</i>                                    | Specimens were identified as 5A <i>C. bifurcatus</i> , 1A <i>Chironomus</i> sp., and 1A <i>C. decorus</i> . The one <i>C. decorus</i> did not agree with the consensus species and was removed.                                                                                                                                                                                                     |
| 42            | <i>Chironomus crassicaudatus</i>  | 1                      | <i>Goeldichironomus</i> sp.                                  | Specimens were identified as 4L <i>C. crassicaudatus</i> , 60L <i>Chironomus</i> sp., 5A <i>C. crassicaudatus</i> , 1A <i>Chironomus</i> sp., and 1L <i>Goeldichironomus</i> sp. The <i>Goeldichironomus</i> sp. did not agree with the consensus genus and was removed.[3,4].                                                                                                                      |
| 43            | <i>Paratanytarsus</i> sp.         | 1                      | <i>Micropsectra</i> sp.                                      | Specimens were identified as 1A <i>Paratanytarsus</i> sp. and 1A <i>Micropsectra</i> sp. BLAST of the <i>Micropsectra</i> sequence gave more than 40 >96.5% matches—to <i>Paratanytarsus</i> ! Thus, <i>Micropsectra</i> did not agree with the consensus identification and was removed.[5].                                                                                                       |
| 53            | <i>Pseudochironomus</i> sp.       | 1                      | <i>Polypedilum halterale</i> gr.                             | Specimens were identified as 2L <i>Pseudochironomus</i> sp. and 1L <i>Polypedilum halterale</i> gr. Sequences were within 2.6% of another set of specimens (branch 52) that were 3L <i>Pseudochironomus</i> sp. and 1A <i>Pseudochironomus fulviventris</i> . <i>Polypedilum halterale</i> gr. did not agree with the consensus genus identification and was removed.[6].                           |
| 54            | <i>Polypedilum halterale</i> gr.  | 1                      | <i>Polypedilum scalaenum</i> gr.                             | Specimens were identified as 26L and 2A <i>Polypedilum halterale</i> gr., and 1L <i>Polypedilum scalaenum</i> gr. <i>Polypedilum scalaenum</i> gr. did not agree with the consensus species and was removed.                                                                                                                                                                                        |
| 56            | <i>Polypedilum halterale</i> gr.  | 1                      | <i>Polypedilum scalaenum</i> gr.                             | Specimens were identified as 17L <i>Polypedilum halterale</i> gr. and 1L <i>Polypedilum scalaenum</i> gr. . <i>Polypedilum scalaenum</i> gr. did not agree with the consensus species and was removed                                                                                                                                                                                               |
| 58            | <i>Cricotopus sylvestris</i>      | 1                      | <i>Cricotopus festivellus</i>                                | Specimens were identified as 7L and 1A <i>Cricotopus</i> sp., 1A <i>Cricotopus sylvestris</i> , and 1A <i>Cricotopus festivellus</i> . <i>C. festivellus</i> did not agree with the consensus GenBank sequences within 3.5% of the sequence and was >5.9% different from other specimens identified as <i>C. festivellus</i> . Therefore, <i>C. festivellus</i> was removed from this branch.[7-9]. |
| 78            | <i>Procladius sublettei</i>       | 1                      | <i>Cladopelma viridulum</i>                                  | Specimens were identified as 10L <i>Procladius</i> sp., 2A <i>Procladius sublettei</i> , and 1A <i>Cladopelma viridulum</i> . <i>Cladopelma viridulum</i> did not agree with the consensus genus and was removed.                                                                                                                                                                                   |

|                                                                   |                                   |    |                                                                                     |                                                                                                                                                                                                                                                                                                                                                                         |
|-------------------------------------------------------------------|-----------------------------------|----|-------------------------------------------------------------------------------------|-------------------------------------------------------------------------------------------------------------------------------------------------------------------------------------------------------------------------------------------------------------------------------------------------------------------------------------------------------------------------|
| 83                                                                | <i>Coelotanypus scapularis</i>    | 2  | <i>Chironomus</i> sp.<br><i>Procladius</i> sp.                                      | Specimens were identified as 61L <i>Coelotanypus</i> sp., 1A <i>Coelotanypus scapularis</i> , 1L <i>Chironomus</i> sp., and 1L <i>Procladius</i> sp. <i>Chironomus</i> sp. and <i>Procladius</i> sp. did not agree with the consensus genus and was removed.                                                                                                            |
| 86                                                                | <i>Tanytarsus mendax</i>          | 1  | <i>Procladius</i> sp.                                                               | Specimens were identified as. and 1A <i>Tanytarsus mendax</i> and 1A <i>Procladius</i> sp. BLAST of the <i>Procladius</i> sequence gave more than 100 >96.5% matches—to <i>Tanytarsus mendax</i> ! Also, this sequence clusters within the Tanytarsini (see tree Fig. 2). Thus, <i>Procladius</i> did not agree with the consensus identification and was removed.[10]. |
| 91                                                                | <i>Rheotanytarsus exiguus</i> gr. | 1  | <i>Paratanytarsus</i> sp.                                                           | Specimens were identified as 3L <i>Rheotanytarsus exiguus</i> gr. and 1L <i>Paratanytarsus</i> sp. <i>Paratanytarsus</i> sp. did not agree with the consensus genus and was removed.[11,12].                                                                                                                                                                            |
| 93                                                                | <i>Stictochironomus devinctus</i> | 1  | <i>Polypedilum halterale</i> gr.                                                    | Specimens were identified as 13L <i>Stictochironomus</i> sp., 3A <i>Stictochironomus devinctus</i> , and 1L <i>Polypedilum halterale</i> gr. <i>Polypedilum</i> did not agree with the consensus genus and was removed.[13].                                                                                                                                            |
| 95                                                                | <i>Cladotanytarsus</i> sp.        | 3  | <i>Coelotanypus</i> sp.<br><i>Cryptochironomus</i> sp.<br><i>Stempellinella</i> sp. | Specimens were identified as 27L <i>Cladotanytarsus</i> sp., 1L <i>Coelotanypus</i> sp., 1L <i>Cryptochironomus</i> sp., and 1L <i>Stempellinella</i> sp. <i>Coelotanypus</i> sp., <i>Cryptochironomus</i> sp., and <i>Stempellinella</i> sp. did not agree with the consensus genus and were removed.                                                                  |
| 99                                                                | <i>Micropsectra insignilobus</i>  | -  | <i>Cladotanytarsus</i> sp.                                                          | Failla et al. (2016) determined that this specimen's sequence, originally identified as <i>Cladotanytarsus</i> sp., was most likely a misidentified <i>Micropsectra insignilobus</i> . The sequence matches 100% to a large number of <i>Micropsectra insignilobus</i> in BOLD and is therefore renamed here as <i>Micropsectra insignilobus</i> .                      |
| 100                                                               | <i>Paratanytarsus natvigi</i>     | 1  | <i>Micropsectra</i> sp.                                                             | Specimens were identified as 1L <i>Paratanytarsus</i> sp., 1A <i>Paratanytarsus</i> sp., 2A <i>Paratanytarsus natvigi</i> , and 1A <i>Micropsectra</i> sp. <i>Micropsectra</i> sp. did not agree with the consensus genus and was removed.                                                                                                                              |
| Total number of sequences removed from database as a likely error |                                   | 21 |                                                                                     |                                                                                                                                                                                                                                                                                                                                                                         |

1. Sublette, J.E. Type specimens of Chironomidae Diptera in the Illinois Natural History Survey Collection, Urbana. *Journal of the Kansas Entomological Society* **1970**, *43*, 44–94.
2. Martin, J. North American species of the genus *Chironomus* as recognized by morphology and larval cytology (includes *Chaetolabis*, *Lobochironomus*, some *Einfeldia* (s.l.) and species included in *Tendipes* by Townes (1945) but now placed in other genera). *Chironomidae* **2020**.
3. Saether, O.A. Revision of *Hydrobaenus*, *Trissocladius*, *Zalutschia*, *Paratrissocladius* and some related genera Diptera Chironomidae. *Bulletin of the Fisheries Research Board of Canada* **1976**, 1–283.
4. Trond, A.; Cranston, P.S.; Epler, J.H. Chironomidae of the Holarctic Region: Keys and Diagnoses, Part 1: Larvae. *Entomologica Society of Lund, Sweden* **2013**, *66*, 573.
5. Reiss, F.; Sawedal, L. Keys to males and pupae of the Palearctic excluding Japan *Paratanytarsus* with descriptions of 3 new species Diptera Chironomidae. *Entomologica Scandinavica Supplement* **1981**, 73–104.
6. Spies, M. A contribution to the knowledge of Holarctic *Parachironomus* Lenz (Diptera: Chironomidae), with two new species and a provisional key to Nearctic adult males. *Tijdschrift voor Entomologie* **2000**, *143*, 125–143.
7. Cranston, P.S.; Oliver, D.R.; Saether, O.A. The adult males of Orthocladiinae (Diptera, Chironomidae) of the Holarctic region - keys and diagnoses. *Entomologica Scandinavica* **1989**, 165–352.

8. Simpson, K.W.; Bode, R.W.; Albu, P. Keys for the genus *Cricotopus* adapted from revision of the genus *Cricotopus* and related taxa Diptera Chironomidae by M. Hirvenoja. *New York State Museum Bulletin* **1983**, 1-23.
9. Soponis, A.R. Revision of Nearctic species of *Orthocladius* (*Orthocladius*) Van der Wulp (Diptera-Chironomidae). *Memoirs of the Entomological Society of Canada* **1977**, 1-187.
10. Ekrem, T.; Sublette, M.F.; Sublette, J.E. North American *Tanytarsus* I. Descriptions and keys to species in the *eminulus*, *gregarius*, *lugens* and *mendax* species groups (Diptera : Chironomidae). *Annals of the Entomological Society of America* **2003**, 96, 265-328.
11. Kyerematen, R.A.K.; Andersen, T. *Rheotanytarsus* Thienemann et Bause (Diptera : Chironomidae) from Central America and Mexico. *Studies on Neotropical Fauna and Environment* **2002**, 37, 23-51.
12. Saether, O.A.; Kyerematen, R.A.K. Towards phylogeny and zoogeography of the genus *Rheotanytarsus* Thienemann et Bause, 1913 (Diptera: Chironomidae). *Tijdschrift voor Entomologie* **2001**, 144, 73-117.
13. Maschwitz, D.E.; Cook, E.F. Revision of the Nearctic species of the genus *Polypedilum* Kieffer (Diptera: Chironomidae) in the subgenera *P. (Polypedilum)* Kieffer and *P. (Uresipedilum)* Oyewo and Saether. *Bulletin of the Ohio Biological Survey* **2000**, 12, I-vii, 1-131.
